# Supplementary material
Source: PubMed Central journal article supplement (PMC3426691)
Supplement: AEM.01162-12_zam019123633so1.pdf [file AEM.01162-12_zam019123633so1.pdf]

Table S1: List of MID bar-coded oligonucleotide primers for pyrosequencing

5'-CGTATCGCCTCCCTCGCGCCATCAGMIDFORWARD-specific-sequence-3'

347F GGAGGCAGCAGTRRGAAT  
803R CTACCRGGGTATCTAATCC

Reverse primer: CTATGCGCCTTGCCAGCCCGCTCAGCTACCRGGGTATCTAATCC

| Sample Code | Barcode    | Sequence                                              |
|-------------|------------|-------------------------------------------------------|
| MID17       | ATACGACGTA | CGTATCGCCTCCCTCGCGCCATCAGATACGACGTAGGAGGCAGCAGTRRGAAT |
| MID18       | CGTAGACTAG | CGTATCGCCTCCCTCGCGCCATCAGCGTAGACTAGGGAGGCAGCAGTRRGAAT |
| MID19       | ACGCGAGTAT | CGTATCGCCTCCCTCGCGCCATCAGACGCGAGTATGGAGGCAGCAGTRRGAAT |
| MID20       | ATAGAGTACT | CGTATCGCCTCCCTCGCGCCATCAGATAGAGTACTGGAGGCAGCAGTRRGAAT |
| MID21       | TACAGATCGT | CGTATCGCCTCCCTCGCGCCATCAGTACAGATCGTGGAGGCAGCAGTRRGAAT |
| MID22       | AGCACTGTAG | CGTATCGCCTCCCTCGCGCCATCAGAGCACTGTAGGGAGGCAGCAGTRRGAAT |
| MID23       | TCTCTATGCG | CGTATCGCCTCCCTCGCGCCATCAGTCTCTATGCGGGAGGCAGCAGTRRGAAT |
| MID24       | TCACGTACTA | CGTATCGCCTCCCTCGCGCCATCAGTCACGTACTAGGAGGCAGCAGTRRGAAT |
| MID25       | TACGAGTATG | CGTATCGCCTCCCTCGCGCCATCAGTACGAGTATGGGAGGCAGCAGTRRGAAT |
| MID26       | ACTACTATGT | CGTATCGCCTCCCTCGCGCCATCAGACTACTATGTGGAGGCAGCAGTRRGAAT |
| MID27       | CACGCTACGT | CGTATCGCCTCCCTCGCGCCATCAGCACGCTACGTGGAGGCAGCAGTRRGAAT |
| MID28       | TACGCTGTCT | CGTATCGCCTCCCTCGCGCCATCAGTACGCTGTCTGGAGGCAGCAGTRRGAAT |
