# Supplementary material
Source: PubMed Central journal article supplement (PMC3426691)
Supplement: AEM.01162-12_zam019123633so2.pdf [file AEM.01162-12_zam019123633so2.pdf]

Table S2. Coral samples included in the healthy- and disease-associated databases adapted from Mouchka et al. 2010\*

| Study                            | Domain   | Method(s)                                        | # of sequences per reef compartment |            |            | Coral spp. surveyed                             | What                     | Where                      |              |
|----------------------------------|----------|--------------------------------------------------|-------------------------------------|------------|------------|-------------------------------------------------|--------------------------|----------------------------|--------------|
|                                  |          |                                                  | Coral                               |            |            |                                                 |                          |                            |              |
|                                  |          |                                                  | Healthy                             | Bleached   | Diseased   |                                                 |                          |                            |              |
| Allers et al. 2008               | bacteria | 16S rRNA surveys                                 |                                     |            | 22         | Fungia                                          | Mucus                    | Red Sea                    |              |
|                                  | archaea  |                                                  | 13                                  |            |            |                                                 | ooocytes, eggs           |                            |              |
| Aprill et al. 2009               | bacteria | 16S rRNA surveys                                 | 151                                 |            |            | Pocillopora meandrina                           | planulae                 | Oahu                       |              |
| Arotsker et al. 2009             | bacteria | 16S rRNA surveys                                 | 131                                 |            |            |                                                 |                          |                            |              |
|                                  | archaea  | Cultivation-based survey                         | 36                                  |            |            | Favia                                           | BBD/Vibrio               | Red Sea, Eilat             |              |
| Ben-Dov et al. 2009              | bacteria | Selected 16S rRNA survey of RFLP-selected OTUs** | 2                                   |            |            | Fungia granulosa                                | Mucus/culture            | Red Sea                    |              |
|                                  | archaea  | 16S rRNA surveys                                 | 31                                  |            |            |                                                 |                          |                            |              |
| Bourne et al. 2005               | bacteria | Selected 16S rRNA survey of DGGE-selected OTUs   | 43                                  |            |            |                                                 |                          |                            |              |
|                                  | archaea  | 16S rRNA surveys                                 | 27                                  |            | 7          | Pocillopora damicornis                          | Slurry                   | GBR                        |              |
| Cervino et al. 2004              | bacteria | Cultivation-based survey                         |                                     |            | 4          | Montastraea spp.                                | Mucus/ YBD               | Bonaire/ Florida           |              |
| Chimetto et al. 2008             | bacteria | Cultivation-based survey                         | 95                                  |            |            | Mussismilia hispida                             | culture/ Vibrio          | Brazil                     |              |
|                                  | archaea  | Selected 16S rRNA survey of ARDRA-selected OTUs  | 23                                  |            | 27         | D. strigosa, M. annularis                       |                          |                            |              |
| Cooney et al. 2002               | bacteria | Selected 16S rRNA survey of DGGE-selected OTUs   |                                     |            | 10         | C. natans                                       | Core/ BBD                | St. Croix, USVI            |              |
| Frias-Lopez et al. 2004          | bacteria | Selected 16S rRNA survey of T-RFLP-selected OTUs |                                     |            | 8          | M. annularis and D. strigosa/ Porites lutea     | tissue slurry/BBD        | Curaçao/PNG- Indo-Pacific  |              |
| Garren et al. 2008               | bacteria | 16S rRNA surveys                                 | 48                                  |            | 89         | Porites, Agaricia, Fungia                       | water/mucus/tissue       | Phillipines                |              |
| Garren et al. 2009               | bacteria | 16S rRNA surveys                                 | 602                                 |            | 89         | Porites cylindrica                              | water/mucus/tissue       | Phillipines                |              |
| Ionescu et al. 2009              | archaea  | 16S rRNA surveys                                 |                                     |            | 37         | Archaea                                         |                          | Red Sea                    |              |
| Jensen et al. 2008               | bacteria | 16S rRNA surveys                                 |                                     |            | 41         | deep water reefs                                | sediment                 | deep water Norway reefs    |              |
| Kapely et al. 2007               | bacteria | 16S rRNA surveys                                 | 82                                  |            |            | Porites spp.                                    | mucus                    | Arabian Sea                |              |
| Kellogg et al. 2004              | archaea  | 16S rRNA surveys                                 | 160                                 |            |            | Diploria clivosa, Solenastrea sp. P. astrooides | mucus                    | Archaea/ Caribbean         |              |
|                                  | archaea  | 16S rRNA surveys                                 | 508                                 |            |            |                                                 |                          |                            |              |
| Kellogg et al. 2009              | bacteria | Selected 16S rRNA survey of DGGE-selected OTUs   | 10                                  |            |            | Lophelia pertusa                                | tissue/mucus/skeleton    | Gulf of Mexico             |              |
| Klaus et al. 2007                | bacteria | 16S rRNA surveys                                 | 248                                 |            |            | M. annularis                                    | mucus/tissues/skeleton   | Curaçao                    |              |
| Kooperman et al. 2007            | bacteria | 16S rRNA surveys                                 | 125                                 |            | 22         | Fungia granulosa                                | mucus                    | Red Sea                    |              |
| Koren et al. 2006                | bacteria | 16S rRNA surveys                                 | 475                                 |            |            | Oculina patagonica                              | mucus/tissues            | Mediterranean              |              |
| Koren et al. 2008                | bacteria | 16S rRNA surveys                                 | 100                                 | 232        |            | O. patagonica                                   | bleached tissues         | Mediterranean              |              |
| Lampert et al. 2008              | bacteria | 16S rRNA surveys                                 | 79                                  |            |            | Fungia scutaria, Platygyra lamellina            |                          | Red Sea                    |              |
|                                  | archaea  | 16S rRNA surveys                                 |                                     |            |            | Acropora tenuis                                 | slurry                   | GBR                        |              |
| Littman et al. 2009a             | bacteria | 16S rRNA surveys                                 | 329                                 |            |            | A. tenuis, A. millepora juveniles               | tissue                   | GBR                        |              |
| Littman et al. 2009b             | bacteria | 16S rRNA surveys                                 | 155                                 |            |            |                                                 |                          |                            |              |
|                                  | archaea  | Selected 16S rRNA survey of ARDRA-selected OTUs  | 32                                  |            | 44         | M. annularis                                    | mucus/tissue/skeleton    | St. Croix USVI, Barbados   |              |
| Pantos et al. 2003               | bacteria | Selected 16S rRNA survey of DGGE-selected OTUs   | 16                                  |            | 18         |                                                 | WP-like disease          |                            |              |
| Pantos et al. 2006               | bacteria | Selected 16S rRNA survey of ARDRA-selected OTUs  | 23                                  |            | 43         | A. palmata - WBD                                | mucus/tissue/skeleton    | Barbados                   |              |
|                                  | archaea  | Cultivation-based survey                         | 27                                  |            |            |                                                 |                          |                            |              |
| Raina et al. 2009                | bacteria | 16S rRNA surveys                                 | 589                                 |            | 81         | Montipora aequituberculata, A. millepora        | water/tissues/mucus      | GBR                        |              |
| Reis et al. 2009                 | bacteria | 16S rRNA surveys                                 | 232                                 |            | 143        | 221                                             | Mussismilia braziliensis | mucus                      | Brazil       |
| Ritchie et al. 2006              | bacteria | Cultivation-based survey                         | 34                                  | 21         |            | 33                                              | Acropora palmata         | mucus                      | Florida Keys |
| Sekar et al. 2006                | bacteria | 16S rRNA surveys                                 | 89                                  |            | 94         | Siderastrea siderea BBD                         | BBD                      | Caribbean                  |              |
| Siboni et al. 2008               | archaea  | 16S rRNA surveys                                 | 212                                 |            | 69         | Favia, Fungi, and Acanthastrea                  | Mucus                    | Red Sea                    |              |
| Sunagawa et al. 2009             | bacteria | 16S rRNA surveys                                 | 317                                 |            | 340        | M. faveolata WPD                                | mucus/tissues/skeleton   | Panama/Puerto Rico         |              |
| Sussman et al. 2008              | bacteria | Cultivation-based survey                         |                                     |            | 23         | White syndrome corals                           | mucus/tissue/skeleton    | Palau/GBR/Marshall Islands |              |
| Yakimov et al. 2006              | bacteria | Selected 16S rRNA survey of RFLP-selected OTUs   | 12                                  |            |            | Archaea                                         | mucus/tissues/skeleton   | Mediterranean              |              |
| <b>Total number of sequences</b> |          |                                                  | <b>5056</b>                         | <b>253</b> | <b>754</b> | <b>711</b>                                      |                          |                            |              |

\*[Adapted from] Mouchka ME, Hewson I, Harvell CD. 2010. Coral-associated bacterial assemblages: current knowledge and the potential for climate-driven impacts. Integ. Compar. Biol. 50:662-674, by permission of Oxford University Press
