# Supplementary material
Source: PubMed Central journal article supplement (PMC3426691)
Supplement: AEM.01162-12_zam019123633so3.pdf [file AEM.01162-12_zam019123633so3.pdf]

Table S3

|                      |              | <i>Montastraea faveolata</i> |              |              |              | <i>Porites astreoides</i> |              |              |              |                      |
|----------------------|--------------|------------------------------|--------------|--------------|--------------|---------------------------|--------------|--------------|--------------|----------------------|
|                      |              | St. Thomas                   | Florida (IS) | Florida (OS) | Belize       | St. Thomas                | Florida (IS) | Florida (OS) | Belize       | Mean ± SE            |
| <i>M. faveolata</i>  | St. Thomas   | <b>47.39</b>                 | 20.65        | 23.22        | 29.21        | 12.60                     | 20.65        | 29.26        | 10.66        | <b>Within Sites</b>  |
|                      | Florida (IS) | 0.01                         | <b>18.27</b> | 17.43        | 17.52        | 13.92                     | 18.27        | 19.06        | 9.19         | 29.4 ± 5.1           |
|                      | Florida (OS) | 0.04                         | <b>0.20</b>  | <b>25.09</b> | 25.92        | 11.21                     | 12.54        | 19.54        | 9.12         | <b>Between Sites</b> |
|                      | Belize       | <b>0.07</b>                  | <b>0.08</b>  | <b>0.41</b>  | <b>26.80</b> | 12.57                     | 11.01        | 20.00        | 12.56        | 22.3 ± 1.9           |
| <i>P. astreoides</i> | St. Thomas   | 0.01                         | 0.01         | 0.04         | 0.01         | <b>35.58</b>              | 21.30        | 20.62        | 14.60        | <b>Within Sites</b>  |
|                      | Florida (IS) | 0.00                         | 0.00         | 0.03         | 0.00         | 0.00                      | <b>21.30</b> | 8.31         | 10.67        | 33.8 ± 13.8          |
|                      | Florida (OS) | 0.01                         | 0.02         | 0.04         | 0.02         | 0.02                      | 0.00         | <b>58.24</b> | 14.38        | <b>Between Sites</b> |
|                      | Belize       | 0.00                         | 0.00         | 0.03         | 0.02         | 0.02                      | 0.00         | 0.01         | <b>19.95</b> | 14.8 ± 2.1           |

\* Pairwise Permutational MANOVA Monte Carlo P-values (Bottom/White)  
 based on Jaccard distance matrix and Average similarity between/within groups (Top/Shaded).
