# Supplementary material
Source: PubMed Central journal article supplement (PMC3426691)
Supplement: AEM.01162-12_zam019123633so4.pdf [file AEM.01162-12_zam019123633so4.pdf]

**Table S4**

a. *M. faveolata* and b. *P. astreoides* percent Similarity (Top) and PERMANOVA

\*significance based on Jaccard distance matrix (Bottom); Mean inter- and intra- site similarities listed

Derived from SILVA database OTU's

| <b>a. <i>M. faveolata</i></b>  | <b>Belize</b> | <b>Florida (IS)</b> | <b>St. Thomas</b> | <b>Mean Similariy ± SE</b> |               |
|--------------------------------|---------------|---------------------|-------------------|----------------------------|---------------|
| <b>Belize</b>                  | -             | 37.21               | 52.02             | <b>Between</b>             | <b>Within</b> |
| <b>Florida IS</b>              | 0.30          | 56.10               | 49.35             | 46% ± 4.6                  | 58% ± 1.7     |
| <b>St. Thomas</b>              | 0.38          | 0.24                | 59.46             |                            |               |
| <b>b. <i>P. astreoides</i></b> | <b>Belize</b> | <b>Florida (IS)</b> | <b>St. Thomas</b> | <b>Mean Similariy ± SE</b> |               |
| <b>Belize</b>                  | 28.57         | 20.11               | 23.12             | <b>Between</b>             | <b>Within</b> |
| <b>Florida IS</b>              | 0.23          | 41.18               | 39.95             | 28% ± 6.2                  | 35% ± 3.7     |
| <b>St. Thomas</b>              | 0.27          | 0.47                | 36.00             |                            |               |

\*All P-values reported as Monte Carlo statistic
